# Supplementary material for: The Use of Vagina–Cervix Length Measurement in Evaluation of Future Reproductive Performance of Sows: A Preliminary Study under Commercial Conditions
Source: PubMed Central journal article supplement (PMC6523857; doi:10.3390/ani9040158), 2019-04-11
Supplement: animals-09-00158-s001.pdf [file animals-09-00158-s001.pdf]

# Supplementary: The Use of Vagina-Cervix Length Measurement in the Valuation of Future Reproductive Performance of Sows: A Preliminary Study in Commercial Conditions

Ryszard Tuz <sup>1,\*</sup>, Tomasz Schwarz <sup>1</sup>, Martyna Małopolska <sup>2</sup> and Jacek Nowicki <sup>1</sup>

<sup>1</sup> Department of Swine and Small Animal Breeding, Institute of Animal Sciences, University of Agriculture in Kraków, Al. Mickiewicza 24/28, 30-059 Kraków, rzschar@cyf-kr.edu.pl (T.S.), j.nowicki@ur.krakow.pl (J.N.)

<sup>2</sup> Department of Pig Breeding, National Research Institute of Animal Production, ul. Krakowska 1, 32-083 Balice n. Kraków, Poland; martyna.malopolska@izoo.krakow.pl

\* Correspondence: rztuz@cyf-kr.edu.pl, Tel.: +48-12-662-40-11

Received: 27 February 2019; Accepted: 2 April 2019; Published: date

**Table S1.** Summary of correlations between litter size and the number of stillborn piglets for groups of sows divided according to VCL (S—short VCL, M—middle VCL, and L—long VCL).

| Input (x) variable | Output (y) variable                 | Regression equation | p-value  | r     |
|--------------------|-------------------------------------|---------------------|----------|-------|
| Litter size        | Stillborn litter size (all litters) | $y = 0.23x - 1.57$  | 0.000000 | 0.388 |
| Litter size S      | Stillborn litter size (S)           | $y = 0.28x - 1.77$  | 0.000020 | 0.377 |
| Litter size M      | Stillborn litter size (M)           | $y = 0.24x - 1.65$  | 0.000000 | 0.414 |
| Litter size L      | Stillborn litter size (L)           | $y = 0.21x - 1.56$  | 0.000000 | 0.371 |

**Table S2.** Summary of correlations between vagina-cervix length (input) and the most important reproductive variables (output) in the analyzed gilts ( $n = 199$ ).

| Input (x) variable | Output (y) variable                    | Regression equation | p-value | r     |
|--------------------|----------------------------------------|---------------------|---------|-------|
| VCL (cm)           | Parity 1 live born litter size         | $y = 0.20x + 3.77$  | 0.001   | 0.227 |
| VCL (cm)           | Total life live born number of piglets | $y = 2.71x + 43.52$ | 0.00003 | 0.292 |
| VCL (cm)           | Mean life live born litter size        | $y = 0.25x + 2.43$  | 0.00000 | 0.374 |
| VCL (cm)           | Parity 1 stillborn litter size         | $y = 0.005x + 0.75$ | 0.900   | 0.009 |
| VCL (cm)           | Total life stillborn number of piglets | $y = 0.32x - 5.44$  | 0.009   | 0.184 |
| VCL (cm)           | Mean life stillborn litter size        | $y = 0.02x + 0.54$  | 0.590   | 0.038 |
| VCL (cm)           | Parity 1 total born litter size        | $y = 0.20x + 4.52$  | 0.0004  | 0.248 |
| VCL (cm)           | Total life number of piglets           | $y = 3.04x - 49.21$ | 0.00004 | 0.289 |
| VCL (cm)           | Mean life litter size                  | $y = 0.27 + 2.97$   | 0.00000 | 0.410 |
| VCL (cm)           | Total life number of litters           | $y = 0.18 - 1.93$   | 0.0009  | 0.233 |

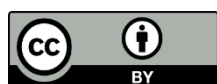

© 2019 by the authors. Submitted for possible open access publication under the terms and conditions of the Creative Commons Attribution (CC BY) license (<http://creativecommons.org/licenses/by/4.0/>).
